# Supplementary material for: Suicide-related discussions with depressed primary care patients in the USA: gender and quality gaps. A mixed methods analysis
Source: PubMed Central journal article supplement — BMJ Open. 2011 Sep 30;1(2):e000198. doi: 10.1136/bmjopen-2011-000198 (PMC3191598; doi:10.1136/bmjopen-2011-000198), 2011-09-30
Supplement: bmjopen-2011-000198-s1.pdf [file bmjopen-2011-000198-s1.pdf]

**No checklist for mixed methods qualitative studies that are observational.**
