# Supplementary material for: Suicide-related discussions with depressed primary care patients in the USA: gender and quality gaps. A mixed methods analysis
Source: PubMed Central journal article supplement — BMJ Open. 2011 Sep 30;1(2):e000198. doi: 10.1136/bmjopen-2011-000198 (PMC3191598; doi:10.1136/bmjopen-2011-000198), 2011-09-30
Supplement: bmjopen-2011-000198.draft_revisions.pdf [file bmjopen-2011-000198.draft_revisions.pdf]

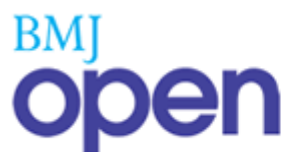

**Suicide Related Discussions With Depressed Primary Care Patients – Gender and Quality Gaps. A mixed methods analysis.**

|                               |                                                                                                                                                               |
|-------------------------------|---------------------------------------------------------------------------------------------------------------------------------------------------------------|
| Journal:                      | <i>BMJ Open</i>                                                                                                                                               |
| Manuscript ID:                | bmjopen-2011-000198                                                                                                                                           |
| Article Type:                 | Research                                                                                                                                                      |
| Date Submitted by the Author: | 27-May-2011                                                                                                                                                   |
| Complete List of Authors:     | Vannoy, Steven; University of Washington, Psychiatry and Behavioral Sciences<br>Robins, Lynne; University of Washington, Medical Education and Bioinformatics |
| <b>Subject Heading</b>:       | Psychiatry                                                                                                                                                    |
| Keywords:                     | Suicide & self-harm < PSYCHIATRY, Depression & mood disorders < PSYCHIATRY, PRIMARY CARE                                                                      |
|                               |                                                                                                                                                               |

SCHOLARONE™  
Manuscripts

only

**Title:** Suicide Related Discussions With Depressed Primary Care Patients – Gender and Quality Gaps. A mixed methods analysis.

**Authors:** Steven D. Vannoy, PhD, MPH<sup>1</sup>; Lynne S. Robins, PhD<sup>2</sup>

**Contributors:** Doug Brock, PhD<sup>3</sup>

<sup>1</sup> Assistant Professor, Department of Psychiatry and Behavioral Sciences, University of Washington, Seattle WA, USA 98195

<sup>2</sup> Professor, Department of Medical Education and Bioinformatics, University of Washington, Seattle WA, USA 98195

<sup>3</sup> Associate Professor, Department of Medical Education and Bioinformatics, University of Washington, Seattle WA, USA 98195

**Design:** Secondary mixed-methods

**Tables:** 3

**Figures:** 3

**Words:** 1925

**Corresponding author:**

Steven Vannoy

svannoy@uw.edu

Tel: 206.221.4046

Fax: 206.221.5414

1959 NE Pacific St. Box 356560

Seattle, WA 98195, USA

**Role of Funders and Data**

Funding for this study was provided in part by the National Center for Research Resources (KL2RR025015) and Agency for Healthcare Research and Quality (5R01HS013172-03). The design, conduct, data collection, analysis, and interpretation of the results of this study were performed independently of the funders. The funding agencies also played no role in review or approval of the manuscript.

**Copyright**

The Corresponding Author has the right to grant on behalf of all authors and does grant on behalf of all authors, an exclusive licence on a worldwide basis to the BMJ Publishing Group Ltd and its licensees, to permit this article (if accepted) to be published in BMJ editions and any other BMJPG products and to exploit all subsidiary rights, as set out in our licence

**Role of Contributors:** Steven Vannoy and Lynne Robins planned and conducted the quantitative and qualitative analyses collaboratively. Doug Brock provided access to

1  
2  
3 and structure of data. Doug Brock and Lynne Robins were co-investigators for the  
4 original data collection.  
5  
6  
7  
8  
9  
10  
11  
12  
13  
14  
15  
16  
17  
18  
19  
20  
21  
22  
23  
24  
25  
26  
27  
28  
29  
30  
31  
32  
33  
34  
35  
36  
37  
38  
39  
40  
41  
42  
43  
44  
45  
46  
47  
48  
49  
50  
51  
52  
53  
54  
55  
56  
57  
58  
59  
60

For peer review only

## Abstract

**Objective:** Characterize suicide risk discussions in depressed primary care patients.

**Design:** Secondary analysis of recordings and self reports by physicians and patients. Descriptive statistics of frequency and predictors of depression and suicide related discussion, with qualitative extraction of disclosure, inquiry and physician response.

**Setting:** Twelve primary care clinics.

**Participants:** 48 primary care physicians and 1776 adult patients.

**Measures:** Presence of depression or suicide related discussions during the encounter as evidenced by qualitative coding. Patient and physician demographics. Depression symptom severity and suicide ideation (SI) as measured by the PHQ9. Physician's decision making style as measured by the Medical Outcomes Study Participatory Decision-Making Scale. Support for autonomy as measured by the Health Care Climate Questionnaire. Trust in their physician as measured by the Primary Care Assessment Survey. Physician response to suicide related inquiry or disclosure.

**Results:** Of the 1776 encounters, 128 involved patients who scored greater than 14 on the PHQ9. These patients were seen by 43 of the 48 physicians. SI was endorsed by 59% (n = 75) of participants. Depression was discussed in 52% of the encounters. Suicide related discussion occurred in only 11% (n = 13). Suicide was

1  
2  
3 discussed in only 1 encounter with a depressed male. Variation in elicitation and  
4  
5 response styles demonstrated preferred and discouraged interviewing strategies.  
6  
7

8  
9 **Conclusions:** Suicide ideation is present in a significant proportion of depressed  
10  
11 primary care patients, but rarely discussed. Men, who carry the highest risk for suicide  
12  
13 are particularly unlikely to disclose their ideation in the encounter and perhaps more  
14  
15 disturbingly, not be asked about it. Patient-centred communication and positive health  
16  
17 care climate do not appear to increase the likelihood that suicide will be discussed.  
18  
19 Physicians should be encouraged to ask about suicide ideation in their depressed  
20  
21 patients, and when disclosure occurs, facilitate discussion and develop targeted  
22  
23 treatment plans.  
24  
25  
26  
27

## 28 **Article Summary**

### 29 **Article Focus**

- 30 • Determine frequency of suicide related discussions in routine primary care  
31  
32 encounters with depressed patients along with demographic predictors  
33  
34
- 35 • Identify process variables that may or may not influence the likelihood that  
36  
37 suicide will be discussed in primary care  
38  
39
- 40 • Analyze interview style related to inquiring about suicide and responding to  
41  
42 patient responses to inquiry as well as unsolicited disclosure  
43  
44  
45  
46  
47  
48

### 49 **Key Messages**

- 50 • Suicide is addressed in a small minority of encounters with depressed  
51  
52 patients in primary care  
53  
54  
55  
56  
57  
58  
59  
60

- Suicide is rarely discussed with depressed male patients who are at high risk for suicide
- Physician inquiries related to suicide are often made with patients who have lowest levels of ideation and the inquiries themselves are often biased to elicit a denial of ideation

### **Strengths and Weaknesses**

- The study involved a large number of primary care physicians and patients representing real world patient encounters
- It is unknown if the topic of suicide had been discussed in previous encounters and how such discussion influenced the present encounter
- We were unable to identify significant predictors of suicide related discussion, yet we were able to demonstrate that some likely candidates such as participatory decision making style and trust were not sufficient.

For inquiries regarding access to de-identified data please contact Dr. Vannoy at svannoy@uw.edu

## Introduction

Depression treatment in primary care patients is common and has been increasing for more than two decades. (1-3) Unmet need makes it likely that primary care will continue to be the dominant source of depression treatment in years to come (4). Depression is a robust risk factor for suicide. (5,6) Suicide is a stigmatized behavior accounting for more than 30,000 deaths (7) and more than 300,000 self-harm related emergency department visits (8) per year in the United States. Despite strong evidence that people who die by suicide are more likely to have seen a primary care provider than mental health provider prior to their death, (9,10) suicide related discussions in primary care appear to be rare. (11) There is evidence that effective depression treatment in primary care can reduce suicide ideation. (12,13)

Under detection and treatment of depression in primary care has been a long-standing concern (14-16) and focus of quality improvement efforts. (17) The problem is pronounced for men, (14) who are also at more than four times the risk of suicide across the lifespan. (7)

Little is known about the detection of and response to suicide risk in depressed primary care patients. Using standardized patients portraying depression and adjustment disorder, Feldman et. al. (18) identified several factors that predicted a physician would inquire about suicide including: severity of depressive symptoms, patient initiated request for antidepressant medication, academic practice setting, and personal experience with depression on behalf of the physician. Equally important, Feldman et. al. did not find significant associations between physician age, gender, type

1  
2  
3 of specialty, perceived barriers to or confidence in treating depression and  
4  
5 communication style as measured by the Measure of Patient Centred Communication.  
6  
7  
8 (19) They were left with 57% of the variance attributable to unmeasured physician  
9  
10 factors.

11  
12  
13 Patient centeredness with respect to both communication and environment has  
14  
15 been emphasized as an important process variable related to quality care. We sought to  
16  
17 identify additional process variables that might predict the likelihood that suicide would  
18  
19 be discussed in routine primary care visits.  
20  
21

## 22 23 24 **Methods**

25  
26  
27 The Establishing Focus (EF) study, conducted from 2002 through 2006, was a  
28  
29 randomized controlled trial of a brief intervention to increase physician skills at  
30  
31 organizing and prioritizing encounter time with particular emphasis on using a patient  
32  
33 centred approach. The study was conducted in a large metropolitan city and recruited  
34  
35 physicians from two settings, an academic medical centre and a large managed care  
36  
37 organization.  
38  
39

40  
41  
42 Physicians were randomized to an educational seminar or no-intervention.  
43  
44 Physicians completed several questionnaires immediately after each encounter (details  
45  
46 below). Following the intervention, patients were recruited at the time of appointment,  
47  
48 on a sequential basis, for all of the physicians enrolled in the trial. Consenting patients  
49  
50 completed a battery of questionnaires (details below) prior to the session and agreed to  
51  
52 have the encounter audio recorded. Inclusion criteria assured that patients had seen the  
53  
54 physician at least once prior to the index encounter.  
55  
56  
57  
58  
59  
60



1  
2  
3 Primary outcomes for the EF study included protocol (agenda setting) behaviours  
4 demonstrated during the early, middle, and late phases of encounters, encounter  
5 length, number of concerns raised, patient satisfaction, trust, and functional status. All  
6 procedures for the original study, as well as the current analysis, were approved by  
7 relevant institutional review boards.  
8  
9  
10  
11  
12  
13

### 14 **Patient Measures**

15  
16 Patient demographics included gender, age, income, and race-ethnicity  
17 categorized as White, Black, Mixed and Other. The Patient Health Questionnaire  
18 (PHQ9) (20) was used to assess depression symptom severity. Scores greater than 14  
19 were coded as positive for depression. Any response greater than “Not at All” on item 9  
20 was coded as positive for suicide ideation (SI). Patients also reported current pain on a  
21 6 point Likert-type scale.  
22  
23  
24  
25  
26  
27  
28  
29  
30  
31  
32  
33

34 The Medical Outcomes Study Participatory Decision-Making Scale (21) was used  
35 to assess differences in patients’ perceptions of their physician’s decision-making style.  
36  
37  
38

39 The Health Care Climate Questionnaire (22) (HCCQ) contains 15 Likert-type  
40 items assessing how supportive of their autonomy patients believed their physicians  
41 were on the day of the visit.  
42  
43  
44  
45  
46

47 The trust sub-scale of the Primary Care Assessment Survey (23) (PCAS)  
48 assesses differences in patients’ confidence about their physician’s integrity,  
49 competence, and willingness to act in their behalf. This sub-scale contains 8 Likert-type  
50 items assessing patient trust and has been demonstrated to predict self-reported health  
51 improvement. (23) One patient satisfaction item from the PCAS was also used.  
52  
53  
54  
55  
56  
57  
58  
59  
60

## Physician Measures

Physician measures included gender, whether or not they had been assigned to the original study's experimental condition, and the type of practice environment in which they worked, either a health maintenance organization (HMO) or an academic affiliated clinic. Physicians rated how fatigued and how rushed they felt during the encounter by two single items, responses were represented on 7-point scales.

## Session Coding

We utilized a qualitative approach to identify adult primary care encounters in which depression or suicide was discussed. Two research assistants were trained to identify depression and suicide related discourse. The training included a glossary of depression and suicide related terms and feedback on a sub-set of encounters screened by one of the authors (SV). Raters were instructed to use a very liberal interpretation of depression or suicide discourse, such that any content that appeared to have a psycho-social focus was to be included. All discrepancies between initial ratings were resolved by one of the authors (SV) in conjunction with the raters. The raters listened to each session and coded it as positive or negative for both depression and suicide content. For each session they noted the time within the session that the first occurrence of depression/suicide discourse occurred and who initiated it. For positively coded encounters, they transcribed the text segment associated with the positive coding(s).

All transcribed text segments were subjected to discourse analysis, including 1) how the topic of suicide was introduced into conversation, 2) by whom the topic was

1  
2  
3 introduced, and 3) the response (or non-response) that followed patient disclosure of SI.  
4  
5 Responses that appeared to follow up on the patient's disclosure of SI were coded as  
6  
7  
8 engaging. We applied a liberal interpretation to being "on topic", coding responses that  
9  
10 were related to the topic of depression or treatment of depression or requests for  
11  
12 clarification as being engaging. Responses that appeared to shift topic or reinforce  
13  
14 denial of ideation were coded as disengaging.  
15  
16

## 17 18 **Results** 19

20  
21 The trial enrolled 48 physicians who saw 1,776 consenting patients. Of these, 43  
22  
23 physicians saw 128 patients who scored positive for depression. Nearly 2/3 of the  
24  
25 depressed sample was female. Only lower levels of pain predicted that a depression  
26  
27 discussion would occur, while only female gender predicted that a suicide related  
28  
29 discussion would occur. Depression was discussed in 52% of the encounters. SI was  
30  
31 endorsed by 59% (n = 75) of participants, yet suicide related discussion occurred in only  
32  
33 11% (n = 13) encounters. Although SI was endorsed in equal proportions by males and  
34  
35 females, suicide was discussed in only 1 encounter with a depressed male. The overall  
36  
37 age range in the sample was 18 to 83, in the depressed group (18 to 76) and in the  
38  
39 suicide discussion group (18 to 76). Detailed patient-level demographics are presented  
40  
41 in Table 1.  
42  
43  
44  
45  
46  
47

48  
49 Physician gender and practice type predicted likelihood of discussing depression,  
50  
51 no physician variables were associated with discussing suicide (Table 1).  
52  
53  
54  
55  
56  
57  
58  
59  
60

1  
2  
3 Only higher ratings of physician decision making style were associated with  
4 discussing depression, and no process variable predicted suicide related discussion  
5  
6 (Table 2).  
7  
8  
9

10  
11 Categorical endorsement of any suicide ideation versus none on PHQ9 item 9  
12 was equal for men and women, yet about 5% more men endorsed SI more than  
13  
14 “several days” than women. (Table 3).  
15  
16  
17

18  
19 When suicide was discussed, the conversation was more frequently initiated by  
20 physicians ( n = 8) than by patients (n = 5). No male patients initiated suicide related  
21 discussion. One female patient raised the issue of suicide ideation in a declaration that  
22 she was not feeling suicidal, the other four declared the presence of ideation.  
23  
24  
25  
26  
27

28  
29 In seven of the eight instances physicians introduced the topic of suicide by  
30 asking explicitly whether the patient wanted to hurt or harm, themselves or commit  
31 suicide (Figure 1). In five of the eight questions, physicians used words or phrases that  
32 are characterized by linguists as having “negative polarity”. These words and phrases  
33 are held to reveal (in their formulations) that the questioner “has grounds for preferring  
34 one answer to another – in this case a negative answer.” (24) (See also Borkin (25),  
35 and Heritage (26)).  
36  
37  
38  
39  
40  
41  
42  
43  
44  
45

46 The four of the five patients who initiated suicide related discussion endorsed the  
47 presence of suicide ideation, one explicitly denied it despite having indicated on her  
48 PHQ9 that she was being bothered by thoughts of death or hurting herself more than  
49  
50 half the days in the past two weeks (Figure 2).  
51  
52  
53  
54

55 Physicians responded to disclosure of SI in equal numbers with respect to  
56  
57  
58  
59  
60

1  
2  
3 engaging versus disengaging communication style. Interestingly, they were twice as  
4 likely to use an engaging rather than disengaging communication style when the patient  
5 denied SI. (Figure 3).  
6  
7  
8  
9

## 10 11 12 **Discussion**

13  
14  
15  
16 Depression continues to be under addressed in PC. We found high rates of  
17 suicide ideation in this sample of depressed primary care patients. Consistent with other  
18 reports, suicide was rarely discussed. Of note, in the few cases in which physicians  
19 asked about suicide, it was with patient's who had the lowest levels of suicide ideation  
20 as reported on the PHQ9. This raises the question as to why patients with frequent  
21 ideation are not getting identified. Perhaps most disturbingly, while SI was equally  
22 prevalent in males and females, it was only discussed in one encounter with a male  
23 patient.  
24  
25  
26  
27  
28  
29  
30  
31  
32  
33  
34  
35

36 We know of no research investigating the impact of micro-linguistic interviewing  
37 strategies on patient disclosure of SI. In a study aimed at eliciting patient concerns (26)  
38 it was demonstrated that even a single word can influence whether patients share all of  
39 their concerns in a PC encounter. Our findings suggest that when physicians ask about  
40 suicidal ideation, they often do so with negative polarity, which may inhibit full disclosure.  
41 Furthermore, there may be compounded effects when a question is negatively polarized  
42 and the physician follows up a patient denial in a way that reinforces the negative  
43 answer (e.g. "that's good"). Future research on how patients and providers collude to  
44 avoid important disclosures about suicide and depression is warranted.  
45  
46  
47  
48  
49  
50  
51  
52  
53  
54  
55  
56  
57  
58  
59  
60

1  
2  
3 Based on our findings, we recommend interventions that explicitly teach patients  
4 to “ask your doctor” about depression (ala public health campaigns) or teach physicians  
5  
6 to “ask your doctor” about depression (ala public health campaigns) or teach physicians  
7  
8 that discussing suicide should be part and parcel with addressing depression through  
9  
10 education programs or quality improvement efforts.  
11

12  
13 Patient centeredness does not guarantee that discussions about suicide will  
14  
15 occur in primary care encounters. Specific methods for increasing suicide related  
16  
17 discourse in primary care is needed.  
18  
19

### 20 21 **Limitations** 22

23  
24 Although this sample is large, the number of identified suicide related  
25  
26 conversations was small, reducing our statistical power to perform inferential analyses.  
27  
28 It is possible that the low occurrence of depression and suicide related conversation is  
29  
30 due to the fact that the patient and provider had discussed this topic at previous visits.  
31  
32 However, from a clinical risk management perspective this is not an adequate  
33  
34 justification for not assessing for the presence and intensity of SI in depressed patients.  
35  
36  
37  
38

### 39 40 **Conclusions** 41

42  
43 Suicide ideation is present in a significant proportion of depressed primary care  
44  
45 patients, but rarely discussed. Men, who carry the highest risk for suicide are  
46  
47 particularly unlikely to disclose their ideation in the encounter and perhaps more  
48  
49 disturbingly, not be asked about it. Patient disclosure of suicide ideation is an important  
50  
51 first step in preventing suicide. Physicians should be encouraged to ask about suicide  
52  
53 ideation in their depressed patients, particularly with men who are at the highest risk to  
54  
55 die from suicide.  
56  
57  
58  
59  
60

1  
2  
3  
4  
5  
6  
7  
8  
9  
10  
11  
12  
13  
14  
15  
16  
17  
18  
19  
20  
21  
22  
23  
24  
25  
26  
27  
28  
29  
30  
31  
32  
33  
34  
35  
36  
37  
38  
39  
40  
41  
42  
43  
44  
45  
46  
47  
48  
49  
50  
51  
52  
53  
54  
55  
56  
57  
58  
59  
60

For peer review only

## Bibliography

1. Olfson M, Marcus SC, Druss B, Elinson L, Tanielian T, Pincus HA. National trends in the outpatient treatment of depression. *JAMA* 2002, Jan 9;287(2):203-9.
2. Kessler RC, Adler L, Ames M, Demler O, Faraone S, Hiripi EVA, et al. The world health organization adult ADHD self-report scale (ASRS): A short screening scale for use in the general population. *Psychol Med* 2005;35(02):245-56.
3. Wang PS, Demler O, Olfson M, Pincus HA, Wells KB, Kessler RC. Changing profiles of service sectors used for mental health care in the united states. *Am J Psychiatry* 2006, Jul;163(7):1187-98.
4. Mojtabai R. Unmet need for treatment of major depression in the united states. *Psychiatr Serv* 2009, Mar;60(3):297-305.
5. Harris EC, Barraclough B. Suicide as an outcome for mental disorders. A meta-analysis. *Br J Psychiatry* 1997, Mar;170:205-28.
6. Pokorny AD. Prediction of suicide in psychiatric patients. Report of a prospective study. *Arch Gen Psychiatry* 1983, Mar;40(3):249-57.
7. WISQARS. National Center for Injury Prevention and Control. WISQARS (Web-Based Injury Statistics Query and Reporting System). Available At: <http://www.cdc.gov/ncipc/>. Accessed May 24, 2007 2007.
8. Claassen CA, Trivedi MH, Shimizu I, Stewart S, Larkin GL, Litovitz T. Epidemiology of nonfatal deliberate self-harm in the united states as described in three medical databases. *Suicide Life Threat Behav* 2006, Apr;36(2):192-212.
9. Luoma JB, Martin CE, Pearson JL. Contact with mental health and primary care providers before suicide: A review of the evidence. *Am J Psychiatry* 2002, Jun;159(6):909-16.
10. Denneson LM, Basham C, Dickinson KC, Crutchfield MC, Millet L, Shen X, Dobscha SK. Suicide risk assessment and content of VA health care contacts before suicide completion by veterans in oregon. *Psychiatr Serv* 2010, Dec;61(12):1192-7.
11. Tai-Seale M, McGuire T, Colenda C, Rosen D, Cook MA. Two-Minute mental health care for elderly patients: Inside primary care visits. *J Am Geriatr Soc* 2007, Dec;55(12):1903-11.
12. Bruce ML, Ten Have TR, Reynolds CF3, Katz ,I, Schulberg HC, Mulsant BH, et al. Reducing suicidal ideation and depressive symptoms in depressed older primary care patients: A randomized controlled trial. *JAMA* 2004 Mar 3;291(9):1081-91 2004.
13. Vannoy SD, Duberstein P, Cukrowicz K, Fan M, Unützer J. Courses of Suicide Ideation During Late-Life Depression Treatment 2007.



14. Schoenbaum M, Sherbourne C, Wells K. Gender patterns in cost effectiveness of quality improvement for depression: Results of a randomized, controlled trial. *J Affect Disord* 2005, Aug;87(2-3):319-25.
15. Wells KB, Hays RD, Burnam MA, Rogers W, Greenfield S, Ware JE. Detection of depressive disorder for patients receiving prepaid or fee-for-service care. Results from the medical outcomes study. *JAMA* 1989, Dec 15;262(23):3298-302.
16. Katon W, von Korff M, Lin E, Bush T, Ormel J. Adequacy and duration of antidepressant treatment in primary care. *Med Care* 1992, Jan;30(1):67-76.
17. World Health Organization. Prevention of suicide: Guidelines for the formulation and implementation of national strategies. 1996.
18. Feldman MD, Franks P, Duberstein PR, Vannoy S, Epstein R, Kravitz RL. Let's not talk about it: Suicide inquiry in primary care. *Ann Fam Med* 2007;5(5):412-8.
19. Brown GS, Burlingame GM, Lambert MJ, Jones E, Vaccaro J. Pushing the quality envelope: A new outcomes management system. *Psychiatr Serv* 2001, Jul;52(7):925-34.
20. Kroenke K, Spitzer RL, Williams JB. The PHQ-9: Validity of a brief depression severity measure. *J Gen Intern Med* 2001, Sep;16(9):606-13.
21. Kaplan SH, Greenfield S, Gandek B, Rogers WH, Ware JEJ. Characteristics of physicians with participatory decision-making styles. *Ann Intern Med* 1996, Mar 1;124(5):497-504.
22. Kasser VG, Ryan RM. The relation of psychological needs for autonomy and relatedness to vitality, well-being, and mortality in a nursing home. *Journal of Applied Social Psychology* Vol 29(5) May 1999, 935-954 1999.
23. Safran DG, Kosinski M, Tarlov AR, Rogers WH, Taira DH, Lieberman N, Ware JE. The primary care assessment survey: Tests of data quality and measurement performance. *Med Care* 1998, May;36(5):728-39.
24. Ladusaw WSA. 2003. Available from: <http://people.ucsc.edu/~ladusaw/docs/WAL7-13-03.pdf>.
25. Polarity items in questions; Chicago linguistic society. 1971o.
26. Heritage J, Robinson JD, Elliott MN, Beckett M, Wilkes M. Reducing patients' unmet concerns in primary care: The difference one word can make. *J Gen Intern Med* 2007, Oct;22(10):1429-33.

| <b>PATIENTS</b>                                                                                                                                                                                                                                                                                                                                                                                                                                                                                                                             | <b>Total Depressed<br/>(n = 128)</b> | <b>Discussed<br/>Depression<br/>(n = 66; 52%)</b>      | <b>Discussed<br/>Suicide<br/>(n = 13; 11%)</b>    |                                                 |
|---------------------------------------------------------------------------------------------------------------------------------------------------------------------------------------------------------------------------------------------------------------------------------------------------------------------------------------------------------------------------------------------------------------------------------------------------------------------------------------------------------------------------------------------|--------------------------------------|--------------------------------------------------------|---------------------------------------------------|-------------------------------------------------|
| Female                                                                                                                                                                                                                                                                                                                                                                                                                                                                                                                                      | 64%                                  | 68%                                                    | 93%+                                              |                                                 |
| Age                                                                                                                                                                                                                                                                                                                                                                                                                                                                                                                                         | 47 (sd =14.2)                        | 45 (sd =13.7)                                          | 41 (sd =15.9)                                     |                                                 |
| Income                                                                                                                                                                                                                                                                                                                                                                                                                                                                                                                                      | \$50,000                             | \$50,000                                               | \$30,000                                          |                                                 |
| Race-Ethnicity                                                                                                                                                                                                                                                                                                                                                                                                                                                                                                                              |                                      |                                                        |                                                   |                                                 |
| White                                                                                                                                                                                                                                                                                                                                                                                                                                                                                                                                       | 69%                                  | 78%                                                    | 77%                                               |                                                 |
| Mixed                                                                                                                                                                                                                                                                                                                                                                                                                                                                                                                                       | 12%                                  | 14%                                                    | 15                                                |                                                 |
| Black                                                                                                                                                                                                                                                                                                                                                                                                                                                                                                                                       | 9%                                   | 5%                                                     | 8%                                                |                                                 |
| All Other                                                                                                                                                                                                                                                                                                                                                                                                                                                                                                                                   | 10%                                  | 3%                                                     | 0%                                                |                                                 |
| Exp Cond                                                                                                                                                                                                                                                                                                                                                                                                                                                                                                                                    | 59%                                  | 58%                                                    | 46%                                               |                                                 |
| PHQ9                                                                                                                                                                                                                                                                                                                                                                                                                                                                                                                                        | 20.1 (sd=3.62)                       | 21.2 (sd=4.47)                                         | 21.7 (sd=4.52)                                    |                                                 |
| PHQ9 item 9                                                                                                                                                                                                                                                                                                                                                                                                                                                                                                                                 | 1.0 (sd=1.07)                        | 1.0 (sd=1.05)                                          | 1.1 (sd=1.14)                                     |                                                 |
| Pain (1 to 6)                                                                                                                                                                                                                                                                                                                                                                                                                                                                                                                               | 4.0 (sd =1.4)                        | 3.5* (sd =1.5)                                         | 3.6 (sd =1.4)                                     |                                                 |
| <b>Physician Demographics</b>                                                                                                                                                                                                                                                                                                                                                                                                                                                                                                               |                                      |                                                        |                                                   |                                                 |
| <b>PHYSICIANS</b>                                                                                                                                                                                                                                                                                                                                                                                                                                                                                                                           | <b>Total<br/>(n = 48)</b>            | <b>Saw<br/>Depressed<br/>Patient<br/>(n = 43; 90%)</b> | <b>Discussed<br/>Depression<br/>(n = 32; 66%)</b> | <b>Discussed<br/>Suicide<br/>(n = 11*; 23%)</b> |
| Female                                                                                                                                                                                                                                                                                                                                                                                                                                                                                                                                      | 42%                                  | 44%                                                    | 58%*                                              | 62%                                             |
| Academic Clinic                                                                                                                                                                                                                                                                                                                                                                                                                                                                                                                             | 65%                                  | 70%                                                    | 84%*                                              | 75%                                             |
| HMO                                                                                                                                                                                                                                                                                                                                                                                                                                                                                                                                         | 35%                                  | 30%                                                    | 16%                                               | 25%                                             |
| Experimental<br>Cond                                                                                                                                                                                                                                                                                                                                                                                                                                                                                                                        | 46%                                  | 58%                                                    | 57%                                               | 50%                                             |
| <p>“Depressed” indicated by PHQ9 score &gt; 14<br/> * indicates statistically significant predictor of discussing depression (p &lt; .05)<br/> + indicates statistically significant predictor of discussing suicide (p &lt; .05)<br/> “Exp Cond” indicates the physician was a part of the original intervention<br/> ** Two physicians had two encounters in which suicide was discussed; hence only 11 unique physicians for 13 encounters.<br/> “Experimental Cond” indicates the physician was a part of the original intervention</p> |                                      |                                                        |                                                   |                                                 |

**Table 2 - Process Variables as Predictors of Depression/Suicide Discussion**

|                                                                                                 | <b>Total Depressed<br/>(n = 128)</b> | <b>Depression Discussed<br/>(n = 66)</b> | <b>Suicide Discussed<br/>(n = 13)</b> |
|-------------------------------------------------------------------------------------------------|--------------------------------------|------------------------------------------|---------------------------------------|
| MOS Participatory Decision Making Style                                                         | 4.1 (sd = .81)                       | 4.3* (sd = .74)                          | 4.1 (sd = .73)                        |
| Health Care Climate Questionnaire                                                               | 6.1 (sd = .91)                       | 6.3 (sd = .84)                           | 6.1 (sd = .98)                        |
| Trust Sub-Scale of the Primary Care Assessment Survey                                           | 6.2 (sd = .82)                       | 6.3 (sd = .72)                           | 6.4 (sd = .82)                        |
| * Indicates characteristic predicted that a depression related discussion would occur (p < .05) |                                      |                                          |                                       |

**Table 3 - Distribution of Responses to PHQ9 Suicide Item**

| In the past two weeks, how often have you been bothered by thoughts that you'd be better off dead or of hurting yourself in some way? | <b>Females<br/>(n = 82)<br/>% (n)</b> | <b>Males<br/>(n = 46)<br/>% (n)</b> |
|---------------------------------------------------------------------------------------------------------------------------------------|---------------------------------------|-------------------------------------|
| <b>Not At All</b>                                                                                                                     | 41% (34)                              | 41% (19)                            |
| <b>Several Days</b>                                                                                                                   | 28% (23)                              | 24% (11)                            |
| <b>More Than Half the Days</b>                                                                                                        | 16% (13)                              | 24% (11)                            |
| <b>Nearly Every Day</b>                                                                                                               | 14% (12)                              | 11% (5)                             |

| <b>Figure 1 - Physician Phrases Initiating Suicide Discussion</b>                                                                                                               | <b>Patient Response</b>                                                                                          | <b>PHQ9 item 9</b> |
|---------------------------------------------------------------------------------------------------------------------------------------------------------------------------------|------------------------------------------------------------------------------------------------------------------|--------------------|
| 1. Since we talked on the phone the other day, I know you're down, but you're <b>not</b> , like, thinking of hurting yourself or <b>anything</b> ?                              | No                                                                                                               | 0                  |
| 2. Sometimes people, when they have thoughts of feeling really sad, they have thoughts of harming themselves. Have you <b>ever</b> had thoughts of suicide or killing yourself? | Mmm-mm (no)                                                                                                      | 0                  |
| 3. Okay. Do you have thoughts of hurting yourself or <b>anything</b> like that?                                                                                                 | No                                                                                                               | 0                  |
| 4. Okay, well, those are definitely depression symptoms. Do you feel like harming yourself?                                                                                     | Mmm, not really                                                                                                  | 1                  |
| 5. Have you had <b>any</b> thoughts of hurting yourself?                                                                                                                        | Yeah                                                                                                             | 2                  |
| 6. You're definitely not thinking about hurting yourself or <b>anything</b> like that?                                                                                          | You know, I have to be honest... (patient goes into long description of stressors and attitudes towards suicide, | 1                  |

|                                                                                                                                                                                                |                                                                                   |   |
|------------------------------------------------------------------------------------------------------------------------------------------------------------------------------------------------|-----------------------------------------------------------------------------------|---|
|                                                                                                                                                                                                | with ultimate denial of intent but clearly has thoughts of wishing she were dead) |   |
| 7. Are you suicidal?*                                                                                                                                                                          | No not yet, I haven't thought about it                                            | 1 |
| 8. Some people get so down that they are having thoughts about ending your life.                                                                                                               | No                                                                                | 0 |
| * Denies it to the physician but reports being bothered by thoughts of death or of hurting herself "Several days" in the past two weeks on the PHQ9<br>Bolded text indicates negative polarity |                                                                                   |   |

| <b>Figure 2 - Patient Phrases Initiating Suicide Discussion</b>                                                                                                                                                                             |                     |                                        |
|---------------------------------------------------------------------------------------------------------------------------------------------------------------------------------------------------------------------------------------------|---------------------|----------------------------------------|
| <b>Patient Disclosure</b>                                                                                                                                                                                                                   | <b>PHQ9 item 9*</b> | <b>Physician Responses</b>             |
| 1. I just feel that I haven't had any suicidal ideation in a year or so, and it's been very pervasive in the last month.                                                                                                                    | 2                   | Are you (inaudible) at the sleep lab   |
| 2. I don't know. I just don't know. I just don't – I'm tired of living like this. I'm so tired of living in pain, I don't want to. I can't-you know                                                                                         | 3                   | You just save it up for me             |
| 3. I've had suicidal things going on with me.                                                                                                                                                                                               | 3                   | Oh, I'm sorry to hear that             |
| 4. I think I should just be buried.                                                                                                                                                                                                         | 0                   | Mm-hmm. Let's see. Shortness of breath |
| 5. I'm <b>not</b> thinking of suicide anymore**                                                                                                                                                                                             | <b>2</b>            | That's good                            |
| * Item nine asks, "How often in the past two weeks have you been bothered by thoughts of death or of hurting yourself?" Response options are "Not at all = 0", "Several days = 1", "More than half the days = 2", or "Nearly every day = 3" |                     |                                        |
| ** Spontaneously denies presence of suicide ideation but indicated being bothered by thoughts of death or hurting herself "more than half the days" in the past two weeks on the PHQ9.                                                      |                     |                                        |

| <b>Figure 3 - Engaging and Disengaging Physician Responses</b> |                                                                                                                                                                   |
|----------------------------------------------------------------|-------------------------------------------------------------------------------------------------------------------------------------------------------------------|
| <b>Physician Responses to Patient Denial of Ideation</b>       |                                                                                                                                                                   |
| <b>Engaging</b>                                                |                                                                                                                                                                   |
| 1.                                                             | Anybody in the family ever had suicidal? Let me look through the family history that I do have. Any family history of depression or anxiety that you're aware of? |
| 2.                                                             | Have you been taking your Zoloft?                                                                                                                                 |
| 3.                                                             | You don't get that?                                                                                                                                               |
| 4.                                                             | Okay. Do you get out and get things done that you want to get done?                                                                                               |
| <b>Disengaging</b>                                             |                                                                                                                                                                   |
| 1.                                                             | Uh huh. Let's see. Have we checked your thyroid?                                                                                                                  |
| 2.                                                             | I didn't think so                                                                                                                                                 |

|                                                                                         |
|-----------------------------------------------------------------------------------------|
|                                                                                         |
| <b>Physician Responses to Patient's Endorsement of Ideation</b>                         |
| <b>Engaging</b>                                                                         |
| 1. When was the last time?                                                              |
| 2. Let me search the (hospital) and see if one of their psychiatrists who has started*  |
| 3. Oh, I'm sorry to hear that                                                           |
|                                                                                         |
| <b>Disengaging</b>                                                                      |
| 1. Are you (inaudible) at the sleep lab?                                                |
| 2. You just save it up for me!                                                          |
| 3. Mm-hmm. Let's see. Shortness of breath                                               |
|                                                                                         |
| * patient interrupts physician at this point, he returns to referral after interruption |

1  
2  
3  
4  
5  
6  
7  
8  
9  
10  
11  
12  
13  
14  
15  
16  
17  
18  
19  
20  
21  
22  
23  
24  
25  
26  
27  
28  
29  
30  
31  
32  
33  
34  
35  
36  
37  
38  
39  
40  
41  
42  
43  
44  
45  
46  
47  
48  
49  
50  
51  
52  
53  
54  
55  
56  
57  
58  
59  
60

No checklist for mixed methods qualitative studies that are observational.

For peer review only

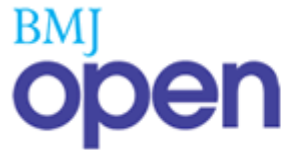

**Suicide Related Discussions With Depressed Primary Care Patients in the U.S. – Gender and Quality Gaps. A Mixed Methods Analysis**

|                                 |                                                                                                                                                               |
|---------------------------------|---------------------------------------------------------------------------------------------------------------------------------------------------------------|
| Journal:                        | <i>BMJ Open</i>                                                                                                                                               |
| Manuscript ID:                  | bmjopen-2011-000198.R1                                                                                                                                        |
| Article Type:                   | Research                                                                                                                                                      |
| Date Submitted by the Author:   | 04-Aug-2011                                                                                                                                                   |
| Complete List of Authors:       | Vannoy, Steven; University of Washington, Psychiatry and Behavioral Sciences<br>Robins, Lynne; University of Washington, Medical Education and Bioinformatics |
| <b>Primary Subject Heading</b>: | Psychiatry                                                                                                                                                    |
| Keywords:                       | Suicide & self-harm < PSYCHIATRY, Depression & mood disorders < PSYCHIATRY, PRIMARY CARE                                                                      |
|                                 |                                                                                                                                                               |

SCHOLARONE™  
Manuscripts

**Title:** Suicide-related Discussions With Depressed Primary Care Patients in the U.S. – Gender and Quality Gaps. A mixed methods analysis.

**Authors:** Steven D. Vannoy, PhD, MPH<sup>1</sup>; Lynne S. Robins, PhD<sup>2</sup>

**Contributors:** Douglas M. Brock, PhD<sup>3</sup>

<sup>1</sup> Assistant Professor, Department of Psychiatry and Behavioral Sciences, University of Washington, Seattle WA, USA 98195

<sup>2</sup> Professor, Department of Medical Education and Bioinformatics, University of Washington, Seattle WA, USA 98195

<sup>3</sup> Associate Professor, Department of Family Medicine, University of Washington, Seattle WA, USA 98195

**Design:** Secondary mixed-methods

**Tables:** 3

**Figures:** 3

**Words:** 2680

**Corresponding author:**

Steven Vannoy  
svannoy@uw.edu  
Tel: 206.221.4046  
Fax: 206.221.5414  
1959 NE Pacific St. Box 356560  
Seattle, WA 98195, USA

**Role of Funders and Data**

Funding for this study was provided in part by the National Center for Research Resources (KL2RR025015) and Agency for Healthcare Research and Quality (5R01HS013172-03). The design, conduct, data collection, analysis, and interpretation of the results of this study were performed independently of the funders. The funding agencies also played no role in review or approval of the manuscript.

**Copyright**

The Corresponding Author has the right to grant on behalf of all authors and does grant on behalf of all authors, an exclusive licence on a worldwide basis to the BMJ Publishing Group Ltd and its licensees, to permit this article (if accepted) to be published in BMJ editions and any other BMJPG products and to exploit all subsidiary rights, as set out in our licence.



## Abstract

**Objective:** Characterize suicide risk discussions in depressed primary care patients.

**Design:** Secondary analysis of recordings and self reports by physicians and patients. Descriptive statistics of depression and suicide-related discussion, with qualitative extraction of disclosure, inquiry and physician response.

Deleted: of frequency and predictors of

**Setting:** Twelve primary care clinics between July 2003 and March 2005.

**Participants:** 48 primary care physicians and 1,776 adult patients.

**Measures:** Presence of depression or suicide-related discussions during the encounter. Patient and physician demographics. Depression symptom severity and suicide ideation as measured by the PHQ9. Physician's decision making style as measured by the Medical Outcomes Study Participatory Decision-Making Scale. Support for autonomy as measured by the Health Care Climate Questionnaire. Trust in their physician as measured by the Primary Care Assessment Survey. Physician response to suicide-related inquiry or disclosure.

Deleted: as evidenced by qualitative coding

**Results:** Of the 1,776 encounters, 128 involved patients scoring greater than 14 on the PHQ9. These patients were seen by 43 of the 48 physicians. Suicide ideation was endorsed by 59% (n = 75). Depression was discussed in 52% of the encounters (n=66). Suicide-related discussion occurred in only 11% (n = 13) of encounters. Ninety-two percent (n = 12) of the suicide discussions occurred with patients scoring < two on PHQ9 item nine. Suicide was discussed in only one encounter with a male. Variation in

Deleted: who scored

Deleted: of participants

Deleted: depressed

1  
2 elicitation and response styles demonstrated preferred and discouraged interviewing  
3  
4 strategies.  
5

6  
7 **Conclusions:** Suicide ideation is present in a significant proportion of depressed  
8  
9 primary care patients, but rarely discussed. Men, who carry the highest risk for suicide,  
10  
11 are unlikely to disclose their ideation ~~or~~ be asked about it. Patient-centred  
12  
13 communication and positive healthcare climate do not appear to increase the likelihood  
14  
15 ~~of suicide related discussion~~. Physicians should be encouraged to ask about suicide  
16  
17 ideation in their depressed patients, and when disclosure occurs, facilitate discussion  
18  
19 and develop targeted treatment plans.  
20

Deleted: particularly

Deleted: in the encounter and perhaps more disturbingly, not

Deleted: that

Deleted: will be

Deleted: ed

## 21 Article Summary

### 22 Article Focus

- 23
- 24
- 25
- 26
- 27 • Determine frequency of suicide-related discussions in routine primary care
- 28 encounters with depressed patients along with demographic predictors.
- 29
- 30 • Identify process variables that may or may not influence the likelihood that
- 31 suicide will be discussed in primary care.
- 32
- 33 • Analyze interview style related to inquiring about suicide and responding to
- 34 patient responses to inquiry as well as unsolicited disclosure.
- 35
- 36
- 37
- 38

### 39 Key Messages

- 40
- 41
- 42 • Suicide is addressed in a small minority of encounters with depressed
- 43 patients in primary care.
- 44
- 45
- 46
- 47
- 48
- 49
- 50
- 51
- 52
- 53
- 54
- 55
- 56
- 57
- 58
- 59
- 60

- 1  
2  
3  
4  
5  
6  
7  
8  
9  
10  
11  
12
- Suicide is rarely discussed with depressed male patients who are at high risk for suicide.
  - Physician inquiries related to suicide are often made with patients who have lowest levels of ideation and the inquiries themselves are often biased to elicit a denial of ideation.

### 13 Strengths and Weaknesses

- 14  
15  
16  
17  
18  
19  
20  
21  
22  
23  
24  
25  
26  
27  
28  
29  
30  
31  
32
- The study involved a large number of primary care physicians and patients representing real world patient encounters.
  - It is unknown if the topic of suicide had been discussed in previous encounters and how such discussion influenced the present encounter.
  - We were unable to identify significant predictors of suicide-related discussion, yet we were able to demonstrate that some likely candidates such as participatory decision making style and trust were not sufficient.

33 For inquiries regarding access to de-identified data please contact Dr. Vannoy at  
34 svannoy@uw.edu  
35  
36  
37  
38  
39  
40  
41  
42  
43  
44  
45  
46  
47  
48  
49  
50  
51  
52  
53  
54  
55  
56  
57  
58  
59  
60

## Introduction

Depression treatment in primary care patients is common in the U. S.(1-4), Europe (5-7), and world-wide (8). Unmet need makes it likely that primary care will continue to be the dominant source of depression treatment in years to come. (9)

**Deleted:** Depression treatment in primary care patients is common and has been increasing for more than two decades. (Olfson 2002; Kessler 2005; Wang 2006; ) U

Depression is a robust risk factor for suicide. (10,11) Suicide is a stigmatized behaviour (12) accounting for more than 30,000 deaths (13) and more than 300,000 self-harm related emergency department visits (14) per year in the United States. In 2007, the most recent year with available data, suicide was the 8<sup>th</sup> leading cause of death for U.S. males aged > 17, occurring at a rate of 23.3/100,000; for females, it was the 17<sup>th</sup> leading cause of death occurring at a rate of 5.75/100,000. (13) Despite strong evidence that people who die by suicide are more likely to have seen a primary care provider than a mental health provider prior to their death, (15,16) suicide-related discussions in primary care appear to be rare. (17) U.S. adults are more than twice as likely to have seen a primary care provider (45%) than a mental health specialist (20%) in the month preceding their death. (15) Frequency of general practitioner visits in the month prior to suicide in Europe are similar. (18,19) There is evidence that effective depression treatment in primary care can reduce suicide ideation, (20-23) particularly in older adults who are at highest risk. (24,25)

Under detection and under treatment of depression in primary care has been a long-standing concern (26-28) and focus of quality improvement efforts. (29) The

1  
2 problem is pronounced for men, (26) who are also at more than four times the risk of  
3  
4 suicide across the lifespan. (13)  
5

6  
7 Little is known about the detection of and response to suicide risk in depressed  
8  
9 primary care patients. Using standardized patients portraying depression and  
10  
11 adjustment disorder, Feldman et al. (30) identified several factors that predicted a  
12  
13 physician would inquire about suicide including: severity of depressive symptoms,  
14  
15 patient initiated request for antidepressant medication, academic practice setting, and  
16  
17 personal experience with depression on behalf of the physician. Equally important,  
18  
19 Feldman et al. did not find significant associations between physician age, gender, type  
20  
21 of specialty, perceived barriers to or confidence in treating depression and  
22  
23 communication style as measured by the Measure of Patient-Centered Communication.  
24  
25 (31) They were left with 57% of the variance attributable to unmeasured physician  
26  
27 factors.  
28

Deleted: Patient

Deleted: Centred

29  
30 Patient centeredness with respect to both communication and environment has  
31  
32 been emphasized as an important process variable related to quality care. We sought to  
33  
34 identify additional process variables that might predict the likelihood that suicide would  
35  
36 be discussed in routine primary care visits.  
37

### 38 Methods

39  
40  
41 This is a secondary analysis of recordings and self reports by physicians and  
42  
43 patients participating in The Establishing Focus Study. Conducted between 2002 and  
44  
45 2006, the Establishing Focus study was a randomized controlled trial of a brief  
46  
47 intervention to increase physician skills at organizing and prioritizing encounter time with  
48  
49  
50  
51  
52  
53  
54  
55  
56  
57  
58  
59  
60

Deleted: s (EF)

Deleted: )

Deleted: The

Deleted: (EF)

Deleted: ,

Deleted: conducted from 2002 through 2006,

1  
2 particular emphasis on using a patient-centred approach. The study was conducted in a  
3  
4 large metropolitan city and recruited physicians from two settings, an academic medical  
5  
6 centre and a large managed care organization.  
7

8  
9 Physicians were randomized to an educational seminar [followed by on-site](#)  
10  
11 [coaching](#) or no-intervention. Physicians completed several questionnaires immediately  
12  
13 after each [patient](#) encounter (details below). [Patients](#) were recruited at the time of  
14  
15 appointment, on a sequential basis, for all of the physicians enrolled in the trial.

Deleted: Following the intervention,

Deleted: p

16  
17 Consenting patients completed [questionnaires](#) (details below) prior to their [clinic](#)  
18  
19 session and agreed to have the encounter audio recorded. Inclusion criteria assured  
20  
21 that patients had seen the physician at least once prior to the index encounter.

Deleted: a battery of

22  
23 Primary outcomes for the [Establishing Focus](#) study included protocol (agenda setting)  
24  
25 behaviours demonstrated during the early, middle, and late phases of encounters,  
26  
27 encounter length, number of concerns raised, patient satisfaction, trust, and functional  
28  
29 status. All procedures for the original study, as well as the current analysis, were  
30  
31 approved by [the University of Washington and Group Health Cooperative](#) institutional  
32  
33 review board.  
34

Deleted: EF

Deleted: relevant

Deleted: s

### 35 36 Patient Measures

37  
38 Patient demographics included gender, age, income, and race-ethnicity  
39  
40 categorized as White, Black, Mixed and Other. The Patient Health Questionnaire  
41  
42 (PHQ9) (32) was used to assess depression symptom severity. Scores greater than 14  
43  
44 were coded as positive for depression. Any response greater than "Not at All" on item 9  
45  
46  
47  
48  
49  
50  
51  
52  
53  
54  
55  
56  
57  
58  
59  
60

1  
2 was coded as positive for suicide ideation. Patients also reported current pain on a 6-  
3  
4 point Likert-type scale.  
5

6  
7 The Medical Outcomes Study Participatory Decision-Making Scale (33) was used  
8  
9 to assess differences in patients' perceptions of their physician's decision-making style.  
10

11  
12 The Health Care Climate Questionnaire (34) (HCCQ) contains 15 Likert-type  
13  
14 items assessing how supportive of their autonomy patients believed their physicians  
15  
16 were on the day of the visit.  
17

18  
19 The trust sub-scale of the Primary Care Assessment Survey (35) (PCAS)  
20  
21 assesses differences in patients' confidence about their physician's integrity,  
22  
23 competence, and willingness to act in their behalf. This sub-scale contains 8 Likert-type  
24  
25 items assessing patient trust and has been demonstrated to predict self-reported health  
26  
27 improvement. (35) One patient-satisfaction item from the PCAS was also used.  
28

### 29 **Physician Measures**

30  
31 Physician measures included gender, whether or not they had been assigned to  
32  
33 the original study's experimental condition, and the type of practice environment in  
34  
35 which they worked, either a health maintenance organization (HMO) or an academic-  
36  
37 affiliated clinic. Physicians rated how fatigued and how rushed they felt during the  
38  
39 encounter by two single items, each on 7-point scales.  
40  
41

Deleted: responses were represented

### 42 **Session Coding**

43  
44 We utilized a qualitative approach to identify adult primary care encounters in  
45  
46 which depression or suicide was discussed. Two research assistants were trained to  
47  
48  
49  
50  
51  
52  
53  
54  
55  
56  
57  
58  
59  
60

1  
2 identify depression and suicide-related discourse. The training included a glossary of  
3 depression and suicide-related terms and feedback on a sub-set of encounters  
4 screened by one of the authors (SV). Raters were instructed to use a very liberal  
5 interpretation of depression or suicide discourse, such that any content that appeared to  
6 have a psycho-social focus was to be included. All discrepancies between initial ratings  
7 were resolved by one of the authors (SV) in conjunction with the raters. The raters  
8 listened to each session and coded it as positive or negative for both depression and  
9 suicide content. For each session they noted the time within the session that the first  
10 occurrence of depression/suicide discourse occurred and who initiated it. For positively  
11 coded encounters, they transcribed the text segment associated with the positive  
12 coding(s).

13  
14 All transcribed text segments were subjected to discourse analysis, including 1)  
15 how the topic of suicide was introduced into conversation, 2) by whom the topic was  
16 introduced, and 3) the response (or non-response) that followed patient disclosure of  
17 suicide ideation. Responses that appeared to follow up on the patient's disclosure of  
18 suicide ideation were coded as engaging. We applied a liberal interpretation to being  
19 "on topic", coding responses that were related to the topic of depression or treatment of  
20 depression or requests for clarification as being engaging. Responses that appeared to  
21 shift topic or reinforce denial of ideation were coded as disengaging.

### Quantitative Analyses



1  
2  
3  
4  
5  
6  
7  
8  
9  
10  
11  
12  
13  
14  
15  
16  
17  
18  
19  
20  
21  
22  
23  
24  
25  
26  
27  
28  
29  
30  
31  
32  
33  
34  
35  
36  
37  
38  
39  
40  
41  
42  
43  
44  
45  
46  
47  
48  
49  
50  
51  
52  
53  
54  
55  
56  
57  
58  
59  
60

We conducted univariate logistic regression analyses to identify potential predictors of depression-related and suicide-related discussions using Stata version 10.

(36)

### Participants and Setting

Between July 2003 and October 2004, Establishing Focus investigators invited all physicians (n= 75) in a convenience sample of twelve community-based primary care clinics serving the Puget Sound region to participate in this study. A total of 59 (79%) physicians consented to participate. Forty-eight physicians participated in all aspects of the study. Thirty-one worked in a university-affiliated primary care network consisting of eight neighborhood clinics. Seventeen physicians worked in a consumer-governed, non-profit health care system. Due to difficulties in study logistics, Establishing Focus investigators elected not to collect data from one clinic with six consented physicians. Hence, in the final data, 33 participating physicians were affiliated with a university-affiliated primary care network (of these, 31 completed all components of the study - 2 disenrolled); 20 physicians were affiliated with a consumer-governed, non-profit health care system (of these 17 completed all components of the study - 3 disenrolled).

Deleted: Results¶

Deleted: we invited

Deleted: we

Patient recruitment began approximately 6 months following completion of the Establishing Focus physician training and lasted one year (March 2004 – March 2005). Eligibility criteria included: being 18 years or older, acting as their own legal guardian, having seen the physician at least twice in the previous two years, having no serious cognitive impairment, and fluency in English. Clinic staff advised study coordinators

1  
2 when eligible patients arrived. The majority (71%) of patients approached agreed to  
3 participate. Most (98%) participants completed the study questionnaires following the  
4 visit.  
5  
6  
7

## 8 Results

9  
10 The 48 enrolled physicians saw 1,776 consenting patients. Of these, 43  
11 physicians saw 128 patients who scored positive for depression. Nearly 2/3 of the  
12 depressed sample was female. Only lower levels of pain predicted that a depression  
13 discussion would occur, while only female gender predicted that a suicide-related  
14 discussion would occur. Depression was discussed in 52% of the encounters. Suicide  
15 ideation was endorsed by 59% (n = 75) of participants, yet suicide-related discussion  
16 occurred in only 11% (n = 13) of encounters. Although suicide ideation was endorsed in  
17 equal proportions by males and females, suicide was discussed in only 1 encounter with  
18 a depressed male. The overall age range in the sample was 18 to 83, in the depressed  
19 group (18 to 76) and in the suicide discussion group (18 to 76). Detailed patient-level  
20 demographics are presented in Table 1.  
21  
22  
23  
24  
25  
26  
27  
28  
29  
30  
31  
32

Deleted: trial

Deleted: 48

Deleted: who

Deleted:

33  
34 Physician gender and practice type predicted likelihood of discussing depression.  
35  
36 No physician variables were associated with discussing suicide (Table 1).  
37

38  
39 Only higher ratings of physician decision-making style were associated with  
40 discussing depression, and no process variable predicted suicide-related discussion  
41 (Table 2).  
42  
43  
44  
45  
46  
47  
48  
49  
50  
51  
52  
53  
54  
55  
56  
57  
58  
59  
60

1  
2 Categorical endorsement of any suicide ideation versus none on PHQ9 item 9  
3 was equal for men and women; however, men were 5% more likely to endorse suicide  
4 ideation greater than “several days” (Table 3).  
5  
6  
7

8  
9 When suicide was discussed, the conversation was more frequently initiated by  
10 physicians (n = 8) than by patients (n = 5). No male patients initiated suicide-related  
11 discussion. One female patient raised the issue of suicide ideation in a declaration that  
12 she was not feeling suicidal; the other four declared the presence of ideation.  
13  
14  
15  
16

17  
18 In seven of the eight instances physicians introduced the topic of suicide by  
19 asking explicitly whether the patient wanted to hurt or harm, themselves or commit  
20 suicide (Figure 1). In five of the eight questions, physicians used words or phrases that  
21 are characterized by linguists as having “negative polarity”. These words and phrases  
22 are held to reveal (in their formulations) that the questioner “has grounds for preferring  
23 one answer to another – in this case a negative answer.” (37) (See also Borkin (38),  
24 and Heritage (39)).  
25  
26  
27  
28  
29  
30

31  
32 Four of the five patients who initiated suicide-related discussion endorsed the  
33 presence of suicide ideation, while one explicitly denied it despite having indicated on  
34 her PHQ9 that she was being bothered by thoughts of death or hurting herself more  
35 than half the days in the past two weeks (Figure 2).  
36  
37  
38

39  
40 Physicians responded to disclosure of suicide ideation in equal numbers with  
41 respect to engaging-versus-disengaging communication style. Interestingly, they were  
42 twice as likely to use an engaging rather than disengaging communication style when  
43 the patient denied suicide ideation (Figure 3).  
44  
45  
46  
47  
48  
49  
50  
51  
52  
53  
54  
55  
56  
57  
58  
59  
60

## Discussion

Depression continues to be under addressed in primary care. We found high rates of suicide ideation in this sample of depressed primary care patients. Consistent with other reports, suicide was rarely discussed. Of note, in the few cases in which physicians asked about suicide, it was with patients who had the lowest levels of suicide ideation as reported on the PHQ9. This raises the question as to why patients with frequent ideation are not getting identified. Perhaps most disturbingly, while suicide ideation was equally prevalent in males and females, it was only discussed in one encounter with a male patient.

We know of no research investigating the impact of micro-linguistic interviewing strategies on patient disclosure of suicide ideation. In a study aimed at eliciting patient concerns, (39) it was demonstrated that even a single word can influence whether patients share all of their concerns in a primary care encounter. Our findings suggest that when physicians ask about suicidal ideation, they often do so with negative polarity, which may inhibit full disclosure. Furthermore, there may be compounded effects when a question is negatively polarized and the physician follows up a patient denial in a way that reinforces the negative answer (e.g. "that's good"). Future research on how patients and providers collude to avoid important disclosures about suicide and depression is warranted.

Based on our findings, we recommend that education programs be designed to teach patients to 'ask your doctor' about depression through public health campaigns

Deleted: made

1  
2 and quality improvement efforts implemented to teach physicians that suicide-related  
3 discourse should be part and parcel of addressing depression.

**Deleted:** interventions that explicitly teach patients to “ask your doctor” about depression (ala public health campaigns) or teach physicians that discussing suicide should be part and parcel with addressing depression through education programs or quality improvement efforts.

4  
5  
6  
7 Patient centeredness does not guarantee that discussions about suicide will  
8 occur in primary care encounters. Specific methods for increasing suicide-related  
9 discourse in primary care is needed.  
10

11  
12  
13 Training for physicians varies a great deal in the U.S. Physicians who train with  
14 patient populations that carry a high burden of suicide may receive more guidance for  
15 engaging patients around suicide and this may account for physician variance related to  
16 how frequently they broach the topic and the style of inquiry used. Educational  
17 interventions should be developed and tested to determine the ability to modify these  
18 important physician behaviors.  
19  
20  
21  
22  
23  
24

### 25 26 **Limitations**

27  
28  
29 Although this sample is large, the number of identified suicide-related  
30 conversations was small, reducing our statistical power to perform inferential analyses.  
31 It is possible that the low occurrence of depression and suicide-related conversation is  
32 due to the fact that the patient and provider had discussed this topic at previous visits. It  
33 is also possible that many patients were being followed by mental health specialists, and  
34 addressing suicide risk there. While some physicians may have been aware that the  
35 patient in question was being followed in specialty care, a prudent clinical action would  
36 include assessing for recent specialty care visits and intent for ongoing management in  
37 specialty care - something we did not see. From a clinical risk management perspective  
38  
39  
40  
41  
42  
43  
44  
45  
46  
47  
48  
49  
50  
51  
52  
53  
54  
55  
56  
57  
58  
59  
60

**Deleted:**

1  
2  
3  
4  
5  
6  
7  
8  
9  
10  
11  
12  
13  
14  
15  
16  
17  
18  
19  
20  
21  
22  
23  
24  
25  
26  
27  
28  
29  
30  
31  
32  
33  
34  
35  
36  
37  
38  
39  
40  
41  
42  
43  
44  
45  
46  
47  
48  
49  
50  
51  
52  
53  
54  
55  
56  
57  
58  
59  
60

deferring all aspects of suicide risk management to mental health specialists is not likely  
to assure optimal care delivery.

**Deleted:** this is not an adequate justification for not assessing for the presence and intensity of SI in d

**Deleted:** epressed patients

All patients and providers were aware that their session was being audio recorded. It is possible that both parties were inhibited from discussing suicide due to this fact. Given the stigma associated with suicide, providers may have felt it was too personal to include in an audio-recorded session.

Physicians may have been reluctant to talk about suicide for fear of actually inducing or increasing suicide ideation. (40,41) While this concern appears frequently in suicide prevention discourse, there is little data to support or refute the concern. However, recently, Crawford et al., (42) found that there was no increase in suicide ideation at follow up with primary care patients screened for suicide. This argument is akin to thinking that asking about smoking or drug use would induce such behaviours. In addition to fear of inducing suicide-related behavior, Stoppe et al. (41) found physicians often cited that asking about suicide was “not necessary”, implying that they were drawing from indirect means whether or not the patient was at risk for suicide.

The large discordance between patient disclosure on the PHQ-9 and spontaneously disclosing to their physician is concerning. In comparing patient self-report to clinician ratings of suicide-related behaviour, Trivedi et. al. (43) found that patients were more likely to endorse suicide intent and plans than physicians. This finding suggests a need for promoting best practices for identifying risk.

**Deleted:** should draw our attention with respect

**Deleted:** to

There was no follow-up data collection in this study, hence we were unable to document suicides or suicide attempts following the visit.

Deleted: ¶

## Conclusions

Suicide ideation is present in a significant proportion of depressed primary care patients, but rarely discussed. Men, who carry the highest risk for suicide, are particularly unlikely to disclose their ideation in the encounter, and perhaps more disturbingly, not be asked about it. Patient disclosure of suicide ideation is an important first step in preventing suicide. Physicians should be encouraged to ask about suicide ideation in their depressed patients, particularly with men who are at the highest risk to die from suicide.

For peer review only

## Bibliography

1. Kessler RC, Adler L, Ames M, Demler O, Faraone S, Hiripi EVA, et al. The world health organization adult ADHD self-report scale (ASRS): A short screening scale for use in the general population. *Psychol Med* 2005;35(02):245-56.
2. Olfson M, Marcus SC, Druss B, Elinson L, Tanielian T, Pincus HA. National trends in the outpatient treatment of depression. *JAMA* 2002, Jan 9;287(2):203-9.
3. Kessler D, Bennewith O, Lewis G, Sharp D. Detection of depression and anxiety in primary care: Follow up study. *BMJ* 2002, Nov 2;325(7371):1016-7.
4. Wang PS, Demler O, Olfson M, Pincus HA, Wells KB, Kessler RC. Changing profiles of service sectors used for mental health care in the United States. *Am J Psychiatry* 2006, Jul;163(7):1187-98.
5. Wittchen HU, Jacobi F. Size and burden of mental disorders in Europe--a critical review and appraisal of 27 studies. *Eur Neuropsychopharmacol* 2005, Aug;15(4):357-76.
6. Rait G, Walters K, Griffin M, Buszewicz M, Petersen I, Nazareth I. Recent trends in the incidence of recorded depression in primary care. *Br J Psychiatry* 2009, Dec;195(6):520-4.
7. Hämäläinen J, Isometsä E, Sihvo S, Kiviruusu O, Pirkola S, Lönnqvist J. Treatment of major depressive disorder in the Finnish general population. *Depress Anxiety* 2009;26(11):1049-59.
8. Usturn TB, Von Korf M. Primary mental health services. In: Üstürn TB, Sartorius N, editors. *Mental illness in general health care: an international study*. Chichester ; New York: John Wiley and Sons; 1995h. p. 347-60.
9. Mojtabai R. Unmet need for treatment of major depression in the United States. *Psychiatr Serv* 2009, Mar;60(3):297-305.
10. Harris EC, Barraclough B. Suicide as an outcome for mental disorders: A meta-analysis. *Br J Psychiatry* 1997, Mar;170:205-28.
11. Pokorny AD. Prediction of suicide in psychiatric patients: Report of a prospective study. *Arch Gen Psychiatry* 1983, Mar;40(3):249-57.
12. Witte TK, Smith AR, Joiner TE. Reason for cautious optimism? Two studies suggesting reduced stigma against suicide. *Journal of Clinical Psychology* 2010, Jun;66(6):611-26.
13. WISQARS. National Center for Injury Prevention and Control. WISQARS (Web-Based Injury Statistics Query and Reporting System). Available At: <http://www.cdc.gov/ncipc/>. Accessed August 2, 2011.



14. Claassen CA, Trivedi MH, Shimizu I, Stewart S, Larkin GL, Litovitz T. Epidemiology of nonfatal deliberate self-harm in the United States as described in three medical databases. *Suicide Life Threat Behav* 2006, Apr;36(2):192-212.
15. Luoma JB, Martin CE, Pearson JL. Contact with mental health and primary care providers before suicide: A review of the evidence. *Am J Psychiatry* 2002, Jun;159(6):909-16.
16. Denneson LM, Basham C, Dickinson KC, Crutchfield MC, Millet L, Shen X, Dobscha SK. Suicide risk assessment and content of VA health care contacts before suicide completion by veterans in Oregon. *Psychiatr Serv* 2010, Dec;61(12):1192-7.
17. Tai-Seale M, McGuire T, Colenda C, Rosen D, Cook MA. Two-Minute mental health care for elderly patients: Inside primary care visits. *J Am Geriatr Soc* 2007, Dec;55(12):1903-11.
18. Pearson A, Saini P, Da Cruz D, Miles C, While D, Swinson N, et al. Primary care contact prior to suicide in individuals with mental illness. *Br J Gen Pract* 2009, Nov;59(568):825-32.
19. Isometsä ET, Heikkinen ME, Marttunen MJ, Henriksson MM, Aro HM, Lönnqvist JK. The last appointment before suicide: Is suicide intent communicated? *Am J Psychiatry* 1995, Jun;152(6):919-22.
20. Schulberg HC, Lee PW, Bruce ML, Raue PJ, Lefever JJ, Williams JW, et al. Suicidal ideation and risk levels among primary care patients with uncomplicated depression. *Ann Fam Med* 2005;3(6):523-8.
21. Rutz W, Walinder J, Eberhard G, Holmberg G, von Knorring AL, von Knorring L, et al. An educational program on depressive disorders for general practitioners on Gotland: Background and evaluation. *Acta Psychiatr Scand* 1989, Jan;79(1):19-26.
22. Szanto K, Kalmar S, Hendin H, Rihmer Z, Mann JJ. A suicide prevention program in a region with a very high suicide rate. *Arch Gen Psychiatry* 2007, Aug 1;64(8):914-20.
23. Henriksson S, Isacson G. Increased antidepressant use and fewer suicides in Jämtland County, Sweden, after a primary care educational programme on the treatment of depression. *Acta Psychiatr Scand* 2006, Sep;114(3):159-67.
24. Bruce ML, Ten Have TR, Reynolds CF3, Katz J, Schulberg HC, Mulsant BH, et al. Reducing suicidal ideation and depressive symptoms in depressed older primary care patients: A randomized controlled trial. *JAMA* 2004 Mar 3;291(9):1081-91 2004.
25. Vannoy SD, Duberstein P, Cukrowicz K, Fan MY, Unützer J. The relationship between suicide ideation and late-life depression. *The American Journal of Geriatric Psychiatry* 2007;15(12):1024-33.
26. Schoenbaum M, Sherbourne C, Wells K. Gender patterns in cost effectiveness of quality improvement for depression: Results of a randomized, controlled trial. *J Affect Disord* 2005, Aug;87(2-3):319-25.

- 1  
2 27. Wells KB, Hays RD, Burnam MA, Rogers W, Greenfield S, Ware JE. Detection of  
3 depressive disorder for patients receiving prepaid or fee-for-service care. Results from  
4 the medical outcomes study. *JAMA* 1989, Dec 15;262(23):3298-302.  
5  
6 28. Katon W, von Korff M, Lin E, Bush T, Ormel J. Adequacy and duration of  
7 antidepressant treatment in primary care. *Med Care* 1992, Jan;30(1):67-76.  
8  
9 29. World Health Organization. Prevention of suicide: Guidelines for the formulation and  
10 implementation of national strategies. 1996.  
11  
12 30. Feldman MD, Franks P, Duberstein PR, Vannoy S, Epstein R, Kravitz RL. Let's not  
13 talk about it: Suicide inquiry in primary care. *Ann Fam Med* 2007;5(5):412-8.  
14  
15 31. Brown GS, Burlingame GM, Lambert MJ, Jones E, Vaccaro J. Pushing the quality  
16 envelope: A new outcomes management system. *Psychiatr Serv* 2001, Jul;52(7):925-  
17 34.  
18  
19 32. Kroenke K, Spitzer RL, Williams JB. The PHQ-9: Validity of a brief depression  
20 severity measure. *J Gen Intern Med* 2001, Sep;16(9):606-13.  
21  
22 33. Kaplan SH, Greenfield S, Gandek B, Rogers WH, Ware JEJ. Characteristics of  
23 physicians with participatory decision-making styles. *Ann Intern Med* 1996, Mar  
24 1;124(5):497-504.  
25  
26 34. Kasser VG, Ryan RM. The relation of psychological needs for autonomy and  
27 relatedness to vitality, well-being, and mortality in a nursing home. *Journal of Applied  
28 Social Psychology* Vol 29(5) May 1999, 935-954 1999.  
29  
30 35. Safran DG, Kosinski M, Tarlov AR, Rogers WH, Taira DH, Lieberman N, Ware JE.  
31 The primary care assessment survey: Tests of data quality and measurement  
32 performance. *Med Care* 1998, May;36(5):728-39.  
33  
34 36. Stata Statistical Software: Release 11 [computer program]. College Station, TX:  
35 StataCorp LP; 2007t.  
36  
37 37. Ladusaw WSA. 2003. Available from: [http://people.ucsc.edu/~ladusaw/docs/WAL7-  
38 13-03.pdf](http://people.ucsc.edu/~ladusaw/docs/WAL7-13-03.pdf).  
39  
40 38. Polarity items in questions; Chicago linguistic society. 1971v.  
41  
42 39. Heritage J, Robinson JD, Elliott MN, Beckett M, Wilkes M. Reducing patients' unmet  
43 concerns in primary care: The difference one word can make. *J Gen Intern Med* 2007,  
44 Oct;22(10):1429-33.  
45  
46 40. Schulberg HC, Bruce ML, Lee PW, Williams JW, Dietrich AJ. Preventing suicide in  
47 primary care patients: The primary care physician's role. *Gen Hosp Psychiatry*  
48 2004;26(5):337-45.  
49  
50 41. Stoppe G, Sandholzer H, Huppertz C, Duwe H, Staedt J. Family physicians and the  
51 risk of suicide in the depressed elderly. *J Affect Disord* 1999, Jul;54(1-2):193-8.  
52  
53  
54  
55  
56  
57  
58  
59  
60

1  
2 42. Crawford MJ, Thana L, Methuen C, Ghosh P, Stanley SV, Ross J, et al. Impact of  
3 screening for risk of suicide: Randomised controlled trial. Br J Psychiatry 2011,  
4 May;198(5):379-84.  
5

6 43. Trivedi MH, Wisniewski SR, Morris DW, Fava M, Gollan JK, Warden D, et al.  
7 Concise health risk tracking scale: A brief self-report and clinician rating of suicidal risk.  
8 J Clin Psychiatry 2011, Jun;72(6):757-64.  
9  
10  
11  
12  
13  
14  
15  
16  
17  
18  
19  
20  
21  
22  
23  
24  
25  
26  
27  
28  
29  
30  
31  
32  
33  
34  
35  
36  
37  
38  
39  
40  
41  
42  
43  
44  
45  
46  
47  
48  
49  
50  
51  
52  
53  
54  
55  
56  
57  
58  
59  
60

For peer review only

| <b>PATIENTS</b>                                                                                                                                                                                                                                                                                                                                                                                                                                                                                                                                        | <b>Total Depressed<br/>(n = 128)</b> | <b>Discussed<br/>Depression<br/>(n = 66; 52%)</b>      | <b>Discussed<br/>Suicide<br/>(n = 13; 11%)</b>    |                                                             |
|--------------------------------------------------------------------------------------------------------------------------------------------------------------------------------------------------------------------------------------------------------------------------------------------------------------------------------------------------------------------------------------------------------------------------------------------------------------------------------------------------------------------------------------------------------|--------------------------------------|--------------------------------------------------------|---------------------------------------------------|-------------------------------------------------------------|
| Female                                                                                                                                                                                                                                                                                                                                                                                                                                                                                                                                                 | 64%                                  | 68%                                                    | 93%+                                              |                                                             |
| Age                                                                                                                                                                                                                                                                                                                                                                                                                                                                                                                                                    | 47 (sd =14.2)                        | 45 (sd =13.7)                                          | 41 (sd =15.9)                                     |                                                             |
| Income                                                                                                                                                                                                                                                                                                                                                                                                                                                                                                                                                 | \$50,000                             | \$50,000                                               | \$30,000                                          |                                                             |
| Race-Ethnicity                                                                                                                                                                                                                                                                                                                                                                                                                                                                                                                                         |                                      |                                                        |                                                   |                                                             |
| White                                                                                                                                                                                                                                                                                                                                                                                                                                                                                                                                                  | 69%                                  | 78%                                                    | 77%                                               |                                                             |
| Mixed                                                                                                                                                                                                                                                                                                                                                                                                                                                                                                                                                  | 12%                                  | 14%                                                    | 15                                                |                                                             |
| Black                                                                                                                                                                                                                                                                                                                                                                                                                                                                                                                                                  | 9%                                   | 5%                                                     | 8%                                                |                                                             |
| All Other                                                                                                                                                                                                                                                                                                                                                                                                                                                                                                                                              | 10%                                  | 3%                                                     | 0%                                                |                                                             |
| Exp Cond                                                                                                                                                                                                                                                                                                                                                                                                                                                                                                                                               | 59%                                  | 58%                                                    | 46%                                               |                                                             |
| PHQ9                                                                                                                                                                                                                                                                                                                                                                                                                                                                                                                                                   | 20.1 (sd=3.62)                       | 21.2 (sd=4.47)                                         | 21.7 (sd=4.52)                                    |                                                             |
| PHQ9 item 9                                                                                                                                                                                                                                                                                                                                                                                                                                                                                                                                            | 1.0 (sd=1.07)                        | 1.0 (sd=1.05)                                          | 1.1 (sd=1.14)                                     |                                                             |
| Pain (1 to 6)                                                                                                                                                                                                                                                                                                                                                                                                                                                                                                                                          | 4.0 (sd =1.4)                        | 3.5* (sd =1.5)                                         | 3.6 (sd =1.4)                                     |                                                             |
| <b>Physician Demographics</b>                                                                                                                                                                                                                                                                                                                                                                                                                                                                                                                          |                                      |                                                        |                                                   |                                                             |
| <b>PHYSICIANS</b>                                                                                                                                                                                                                                                                                                                                                                                                                                                                                                                                      | <b>Total<br/>(n = 48)</b>            | <b>Saw<br/>Depressed<br/>Patient<br/>(n = 43; 90%)</b> | <b>Discussed<br/>Depression<br/>(n = 32; 66%)</b> | <b>Discussed<br/>Suicide<br/>(n = 11<sup>**</sup>; 23%)</b> |
| Female                                                                                                                                                                                                                                                                                                                                                                                                                                                                                                                                                 | 42%                                  | 44%                                                    | 58%*                                              | 62%                                                         |
| Academic Clinic                                                                                                                                                                                                                                                                                                                                                                                                                                                                                                                                        | 65%                                  | 70%                                                    | 84%*                                              | 75%                                                         |
| HMO                                                                                                                                                                                                                                                                                                                                                                                                                                                                                                                                                    | 35%                                  | 30%                                                    | 16%                                               | 25%                                                         |
| Experimental<br>Cond                                                                                                                                                                                                                                                                                                                                                                                                                                                                                                                                   | 46%                                  | 58%                                                    | 57%                                               | 50%                                                         |
| <p>"Depressed" indicated by PHQ9 score &gt; 14<br/> * indicates statistically significant predictor of discussing depression (p &lt; .05)<br/> + indicates statistically significant predictor of discussing suicide (p &lt; .05)<br/> "Exp Cond" indicates the physician was a part of the original intervention<br/> <sup>**</sup> Two physicians had two encounters in which suicide was discussed; hence only 11 unique physicians for 13 encounters.<br/> "Experimental Cond" indicates the physician was a part of the original intervention</p> |                                      |                                                        |                                                   |                                                             |

1  
2  
3  
4  
5  
6  
7  
8  
9  
10  
11  
12  
13  
14  
15  
16

|                                                       | <b>Total Depressed<br/>(n = 128)</b> | <b>Depression Discussed<br/>(n = 66)</b> | <b>Suicide Discussed<br/>(n = 13)</b> |
|-------------------------------------------------------|--------------------------------------|------------------------------------------|---------------------------------------|
| MOS Participatory Decision Making Style               | 4.1 (sd = .81)                       | 4.3* (sd = .74)                          | 4.1 (sd = .73)                        |
| Health Care Climate Questionnaire                     | 6.1 (sd = .91)                       | 6.3 (sd = .84)                           | 6.1 (sd = .98)                        |
| Trust Sub-Scale of the Primary Care Assessment Survey | 6.2 (sd = .82)                       | 6.3 (sd = .72)                           | 6.4 (sd = .82)                        |

\* Indicates characteristic predicted that a depression related discussion would occur (p < .05)

17  
18  
19  
20  
21  
22  
23  
24  
25  
26  
27  
28

| In the past two weeks, how often have you been bothered by thoughts that you'd be better off dead or of hurting yourself in some way? | <b>Females<br/>(n = 82)<br/>% (n)</b> | <b>Males<br/>(n = 46)<br/>% (n)</b> |
|---------------------------------------------------------------------------------------------------------------------------------------|---------------------------------------|-------------------------------------|
| <b>Not At All</b>                                                                                                                     | 41% (34)                              | 41% (19)                            |
| <b>Several Days</b>                                                                                                                   | 28% (23)                              | 24% (11)                            |
| <b>More Than Half the Days</b>                                                                                                        | 16% (13)                              | 24% (11)                            |
| <b>Nearly Every Day</b>                                                                                                               | 14% (12)                              | 11% (5)                             |

29  
30  
31  
32  
33  
34  
35  
36  
37  
38  
39  
40  
41  
42  
43  
44  
45  
46  
47  
48  
49  
50  
51  
52  
53  
54  
55  
56  
57  
58  
59  
60

| <b>Physician Phrases Initiating Suicide Discussion</b>                                                                                                                          | <b>Patient Response</b>                                                                                          | <b>PHQ9 item 9</b> |
|---------------------------------------------------------------------------------------------------------------------------------------------------------------------------------|------------------------------------------------------------------------------------------------------------------|--------------------|
| 1. Since we talked on the phone the other day, I know you're down, but you're <b>not</b> , like, thinking of hurting yourself or <b>anything</b> ?                              | No                                                                                                               | 0                  |
| 2. Sometimes people, when they have thoughts of feeling really sad, they have thoughts of harming themselves. Have you <b>ever</b> had thoughts of suicide or killing yourself? | Mmm-mm (no)                                                                                                      | 0                  |
| 3. Okay. Do you have thoughts of hurting yourself or <b>anything</b> like that?                                                                                                 | No                                                                                                               | 0                  |
| 4. Okay, well, those are definitely depression symptoms. Do you feel like harming yourself?                                                                                     | Mmm, not really                                                                                                  | 1                  |
| 5. Have you had <b>any</b> thoughts of hurting yourself?                                                                                                                        | Yeah                                                                                                             | 2                  |
| 6. You're definitely not thinking about hurting yourself or <b>anything</b> like that?                                                                                          | You know, I have to be honest... (patient goes into long description of stressors and attitudes towards suicide, | 1                  |

|                                                                                                                                                                                                |                                                                                   |   |
|------------------------------------------------------------------------------------------------------------------------------------------------------------------------------------------------|-----------------------------------------------------------------------------------|---|
|                                                                                                                                                                                                | with ultimate denial of intent but clearly has thoughts of wishing she were dead) |   |
| 7. Are you suicidal?*                                                                                                                                                                          | No not yet, I haven't thought about it                                            | 1 |
| 8. Some people get so down that they are having thoughts about ending your life.                                                                                                               | No                                                                                | 0 |
| * Denies it to the physician but reports being bothered by thoughts of death or of hurting herself "Several days" in the past two weeks on the PHQ9<br>Bolded text indicates negative polarity |                                                                                   |   |

**Figure 2 - Patient Phrases Initiating Suicide Discussion**

| Patient Disclosure                                                                                                                                                                                                                          | PHQ9 item 9* | Physician Responses                    |
|---------------------------------------------------------------------------------------------------------------------------------------------------------------------------------------------------------------------------------------------|--------------|----------------------------------------|
| 1. I just feel that I haven't had any suicidal ideation in a year or so, and it's been very pervasive in the last month.                                                                                                                    | 2            | Are you (inaudible) at the sleep lab   |
| 2. I don't know. I just don't know. I just don't – I'm tired of living like this. I'm so tired of living in pain, I don't want to. I can't-you know                                                                                         | 3            | You just save it up for me             |
| 3. I've had suicidal things going on with me.                                                                                                                                                                                               | 3            | Oh, I'm sorry to hear that             |
| 4. I think I should just be buried.                                                                                                                                                                                                         | 0            | Mm-hmm. Let's see. Shortness of breath |
| 5. I'm <b>not</b> thinking of suicide anymore**                                                                                                                                                                                             | <b>2</b>     | That's good                            |
| * Item nine asks, "How often in the past two weeks have you been bothered by thoughts of death or of hurting yourself?" Response options are "Not at all = 0", "Several days = 1", "More than half the days = 2", or "Nearly every day = 3" |              |                                        |
| ** Spontaneously denies presence of suicide ideation but indicated being bothered by thoughts of death or hurting herself "more than half the days" in the past two weeks on the PHQ9.                                                      |              |                                        |

**Figure 3 - Engaging and Disengaging Physician Responses**

| Physician Responses to Patient Denial of Ideation |                                                                                                                                                                   |
|---------------------------------------------------|-------------------------------------------------------------------------------------------------------------------------------------------------------------------|
| <b>Engaging</b>                                   |                                                                                                                                                                   |
| 1.                                                | Anybody in the family ever had suicidal? Let me look through the family history that I do have. Any family history of depression or anxiety that you're aware of? |
| 2.                                                | Have you been taking your Zoloft?                                                                                                                                 |
| 3.                                                | You don't get that?                                                                                                                                               |
| 4.                                                | Okay. Do you get out and get things done that you want to get done?                                                                                               |
| <b>Disengaging</b>                                |                                                                                                                                                                   |
| 1.                                                | Uh huh. Let's see. Have we checked your thyroid?                                                                                                                  |
| 2.                                                | I didn't think so                                                                                                                                                 |

|                                                                                         |
|-----------------------------------------------------------------------------------------|
|                                                                                         |
| <b>Physician Responses to Patient's Endorsement of Ideation</b>                         |
| <b>Engaging</b>                                                                         |
| 1. When was the last time?                                                              |
| 2. Let me search the (hospital) and see if one of their psychiatrists who has started*  |
| 3. Oh, I'm sorry to hear that                                                           |
|                                                                                         |
| <b>Disengaging</b>                                                                      |
| 1. Are you (inaudible) at the sleep lab?                                                |
| 2. You just save it up for me!                                                          |
| 3. Mm-hmm. Let's see. Shortness of breath                                               |
|                                                                                         |
| * patient interrupts physician at this point, he returns to referral after interruption |

1  
2  
3  
4  
5  
6  
7  
8  
9  
10  
11  
12  
13  
14  
15  
16  
17  
18  
19  
20  
21  
22  
23  
24  
25  
26  
27  
28  
29  
30  
31  
32  
33  
34  
35  
36  
37  
38  
39  
40  
41  
42  
43  
44  
45  
46  
47  
48  
49  
50  
51  
52  
53  
54  
55  
56  
57  
58  
59  
60

No checklist for mixed methods qualitative studies that are observational.

For peer review only
